# Supplementary material for: Thermotolerant cyclamen with reduced acrolein and methyl vinyl ketone
Source: PubMed Central journal article supplement — J Exp Bot. 2012 Apr 17;63(11):4143–50. doi: 10.1093/jxb/ers110 (PMC3398453; doi:10.1093/jxb/ers110), 2012-04-17
Supplement: supp_ers110_00074690-file001.pdf [file supp_ers110_00074690-file001.pdf]

# **Thermotolerant cyclamen with reduced acrolein and methyl vinyl ketone**

*Hiroomi Kai, Keita Hirashima, Osamu Matsuda, Hidetoshi Ikegami, Traud Winkelmann, Takao Nakahara, and Koh Iba*

## **Supplementary Material**

**Table S1.** Thermotolerance of cyclamen cultivars, WT and transgenic lines. After initial growth for 6 months at 20°C under 16 h light (70  $\mu\text{mol m}^{-2} \text{s}^{-1}$ ), seedlings with 4-5 leaves were exposed to 38°C for 7 days under constant light (70  $\mu\text{mol m}^{-2} \text{s}^{-1}$ ). Leaves with wilting or browning parts were counted as injured, and seedlings with at least two injured leaves were scored as damaged. Values are means  $\pm$  SD (n=3).

| Cultivar                       | Breeder                | Time (days)   |                 |                 |                 |                 |                 |                |                |
|--------------------------------|------------------------|---------------|-----------------|-----------------|-----------------|-----------------|-----------------|----------------|----------------|
|                                |                        | 0             | 1               | 2               | 3               | 4               | 5               | 6              | 7              |
| 'Halios Pure White Early'      | MOREL DIFFUSION S.A.S. | 0.0 $\pm$ 0.0 | 0.0 $\pm$ 0.0   | 25.0 $\pm$ 12.5 | 79.2 $\pm$ 7.2  | 95.8 $\pm$ 7.2  | 100 $\pm$ 0.0   | 100 $\pm$ 0.0  | 100 $\pm$ 0.0  |
| 'Metis Victoria Deco Mix'      | MOREL DIFFUSION S.A.S. | 0.0 $\pm$ 0.0 | 0.0 $\pm$ 0.0   | 45.8 $\pm$ 7.2  | 83.3 $\pm$ 7.2  | 91.7 $\pm$ 7.2  | 100 $\pm$ 0.0   | 100 $\pm$ 0.0  | 100 $\pm$ 0.0  |
| 'Metis Scarlet Compact'        | MOREL DIFFUSION S.A.S. | 0.0 $\pm$ 0.0 | 0.0 $\pm$ 0.0   | 4.2 $\pm$ 7.2   | 41.7 $\pm$ 7.2  | 91.7 $\pm$ 7.2  | 100 $\pm$ 0.0   | 100 $\pm$ 0.0  | 100 $\pm$ 0.0  |
| 'Latinia Light Pink with Eye'  | MOREL DIFFUSION S.A.S. | 0.0 $\pm$ 0.0 | 16.7 $\pm$ 14.4 | 58.3 $\pm$ 19.1 | 91.7 $\pm$ 7.2  | 100 $\pm$ 0.0   | 100 $\pm$ 0.0   | 100 $\pm$ 0.0  | 100 $\pm$ 0.0  |
| 'Miracle Scarlet'              | Goldsmith              | 0.0 $\pm$ 0.0 | 0.0 $\pm$ 0.0   | 45.8 $\pm$ 7.2  | 62.5 $\pm$ 12.5 | 95.8 $\pm$ 7.2  | 100 $\pm$ 0.0   | 100 $\pm$ 0.0  | 100 $\pm$ 0.0  |
| 'Laser Salmon'                 | Goldsmith              | 0.0 $\pm$ 0.0 | 0.0 $\pm$ 0.0   | 20.8 $\pm$ 7.2  | 79.2 $\pm$ 7.2  | 100 $\pm$ 0.0   | 100 $\pm$ 0.0   | 100 $\pm$ 0.0  | 100 $\pm$ 0.0  |
| 'Midori White with Eye'        | Goldsmith              | 0.0 $\pm$ 0.0 | 0.0 $\pm$ 0.0   | 45.8 $\pm$ 7.2  | 83.3 $\pm$ 7.2  | 91.7 $\pm$ 7.2  | 100 $\pm$ 0.0   | 100 $\pm$ 0.0  | 100 $\pm$ 0.0  |
| 'Maxora Red'                   | VARINOVA               | 0.0 $\pm$ 0.0 | 0.0 $\pm$ 0.0   | 45.8 $\pm$ 7.2  | 54.2 $\pm$ 7.2  | 91.7 $\pm$ 7.2  | 100 $\pm$ 0.0   | 100 $\pm$ 0.0  | 100 $\pm$ 0.0  |
| 'Concerto Rose Pink'           | Syngenta seeds         | 0.0 $\pm$ 0.0 | 0.0 $\pm$ 0.0   | 29.2 $\pm$ 7.2  | 58.3 $\pm$ 7.2  | 91.7 $\pm$ 7.2  | 100 $\pm$ 0.0   | 100 $\pm$ 0.0  | 100 $\pm$ 0.0  |
| 'Concerto White with Eye Iris' | Syngenta seeds         | 0.0 $\pm$ 0.0 | 4.2 $\pm$ 7.2   | 33.3 $\pm$ 7.2  | 41.7 $\pm$ 7.2  | 58.3 $\pm$ 19.1 | 87.5 $\pm$ 12.5 | 100 $\pm$ 0.0  | 100 $\pm$ 0.0  |
| 'Libretto Violet'              | Syngenta seeds         | 0.0 $\pm$ 0.0 | 0.0 $\pm$ 0.0   | 16.7 $\pm$ 7.2  | 50.0 $\pm$ 12.5 | 95.8 $\pm$ 7.2  | 100 $\pm$ 0.0   | 100 $\pm$ 0.0  | 100 $\pm$ 0.0  |
| 'Super Compact White with Eye' | Schoneveld Twello b.v. | 0.0 $\pm$ 0.0 | 8.3 $\pm$ 7.2   | 58.3 $\pm$ 14.4 | 95.8 $\pm$ 7.2  | 95.8 $\pm$ 7.2  | 100 $\pm$ 0.0   | 100 $\pm$ 0.0  | 100 $\pm$ 0.0  |
| 'Super Compact Violet flamed'  | Schoneveld Twello b.v. | 0.0 $\pm$ 0.0 | 12.5 $\pm$ 12.5 | 79.2 $\pm$ 7.2  | 100 $\pm$ 0.0   | 100 $\pm$ 0.0   | 100 $\pm$ 0.0   | 100 $\pm$ 0.0  | 100 $\pm$ 0.0  |
| 'Super Micro Red'              | Schoneveld Twello b.v. | 0.0 $\pm$ 0.0 | 0.0 $\pm$ 0.0   | 16.7 $\pm$ 7.2  | 33.3 $\pm$ 7.2  | 79.2 $\pm$ 7.2  | 87.5 $\pm$ 12.5 | 100 $\pm$ 0.0  | 100 $\pm$ 0.0  |
| 'Super Original Red'           | Schoneveld Twello b.v. | 0.0 $\pm$ 0.0 | 0.0 $\pm$ 0.0   | 41.7 $\pm$ 7.2  | 58.3 $\pm$ 7.2  | 95.8 $\pm$ 7.2  | 100 $\pm$ 0.0   | 100 $\pm$ 0.0  | 100 $\pm$ 0.0  |
| WT                             |                        | 0.0 $\pm$ 0.0 | 4.2 $\pm$ 7.2   | 16.7 $\pm$ 7.2  | 66.7 $\pm$ 7.2  | 95.8 $\pm$ 7.2  | 100 $\pm$ 0.0   | 100 $\pm$ 0.0  | 100 $\pm$ 0.0  |
| T15                            |                        | 0.0 $\pm$ 0.0 | 0.0 $\pm$ 0.0   | 4.2 $\pm$ 7.2   | 4.2 $\pm$ 7.2   | 20.8 $\pm$ 14.4 | 45.8 $\pm$ 7.2  | 54.2 $\pm$ 7.2 | 79.2 $\pm$ 7.2 |
| T31                            |                        | 0.0 $\pm$ 0.0 | 0.0 $\pm$ 0.0   | 0.0 $\pm$ 0.0   | 12.5 $\pm$ 12.5 | 12.5 $\pm$ 12.5 | 37.5 $\pm$ 12.5 | 45.8 $\pm$ 7.2 | 66.7 $\pm$ 7.2 |

**Table S2.** Compositions of fatty acids in leaf tissues of various cyclamen cultivars. Plants were grown on 1/2 MS medium to the 4-5 leaf stage at 20°C under 16 h light (70  $\mu\text{mol m}^{-2} \text{s}^{-1}$ ). Detached leaves (4.0 x 4.0 cm) were analyzed for their fatty acid composition by gas chromatography. Values are means  $\pm$  SD (n=3).

| Cultivar                       | Fatty acid (mol%) |               |                |                |                |
|--------------------------------|-------------------|---------------|----------------|----------------|----------------|
|                                | 16:0              | 18:0          | 18:1           | 18:2           | 18:3           |
| 'Halios Pure White Early'      | 20.4 $\pm$ 0.7    | 5.4 $\pm$ 3.2 | 4.5 $\pm$ 0.4  | 15.5 $\pm$ 1.1 | 54.2 $\pm$ 2.2 |
| 'Metis Victoria Deco Mix'      | 21.5 $\pm$ 0.4    | 2.7 $\pm$ 0.0 | 6.6 $\pm$ 0.2  | 16.2 $\pm$ 0.8 | 53.0 $\pm$ 1.0 |
| 'Metis Scarlet Compact'        | 18.7 $\pm$ 0.7    | 3.4 $\pm$ 0.2 | 3.3 $\pm$ 0.2  | 15.1 $\pm$ 1.2 | 59.5 $\pm$ 2.2 |
| 'Latinia Light Pink with Eye'  | 20.9 $\pm$ 4.1    | 3.0 $\pm$ 0.1 | 19.4 $\pm$ 4.1 | 10.9 $\pm$ 1.3 | 45.9 $\pm$ 7.2 |
| 'Miracle Scarlet'              | 17.3 $\pm$ 0.5    | 3.7 $\pm$ 0.3 | 4.7 $\pm$ 0.2  | 14.6 $\pm$ 1.5 | 59.7 $\pm$ 1.4 |
| 'Laser Salmon'                 | 19.4 $\pm$ 1.0    | 3.0 $\pm$ 0.3 | 5.0 $\pm$ 0.3  | 13.2 $\pm$ 0.2 | 59.3 $\pm$ 0.6 |
| 'Midori White with Eye'        | 21.3 $\pm$ 0.7    | 3.5 $\pm$ 1.0 | 6.3 $\pm$ 0.0  | 12.0 $\pm$ 0.9 | 56.9 $\pm$ 0.7 |
| 'Maxora Red'                   | 18.9 $\pm$ 0.5    | 3.6 $\pm$ 0.1 | 4.5 $\pm$ 0.5  | 17.2 $\pm$ 1.6 | 55.8 $\pm$ 1.1 |
| 'Concerto Rose Pink'           | 18.7 $\pm$ 0.4    | 3.5 $\pm$ 0.1 | 5.3 $\pm$ 1.0  | 14.1 $\pm$ 1.2 | 58.4 $\pm$ 1.6 |
| 'Concerto White with Eye Iris' | 19.8 $\pm$ 0.7    | 3.1 $\pm$ 0.3 | 7.1 $\pm$ 0.9  | 18.6 $\pm$ 0.5 | 51.4 $\pm$ 1.4 |
| 'Libretto Violet'              | 20.4 $\pm$ 0.4    | 2.1 $\pm$ 0.2 | 5.2 $\pm$ 0.6  | 13.0 $\pm$ 0.9 | 59.3 $\pm$ 0.9 |
| 'Super Compact White with Eye' | 19.7 $\pm$ 1.5    | 3.6 $\pm$ 0.3 | 9.4 $\pm$ 0.1  | 13.1 $\pm$ 1.0 | 54.3 $\pm$ 0.3 |
| 'Super Compact Violet flamed'  | 18.4 $\pm$ 0.7    | 3.1 $\pm$ 0.1 | 4.6 $\pm$ 0.3  | 18.2 $\pm$ 0.4 | 55.7 $\pm$ 0.8 |
| 'Super Micro Red'              | 19.0 $\pm$ 0.8    | 1.9 $\pm$ 0.1 | 9.8 $\pm$ 1.7  | 16.3 $\pm$ 1.0 | 53.0 $\pm$ 0.7 |
| 'Super Original Red'           | 19.3 $\pm$ 0.4    | 2.6 $\pm$ 0.0 | 9.7 $\pm$ 0.8  | 14.0 $\pm$ 0.4 | 54.4 $\pm$ 0.8 |

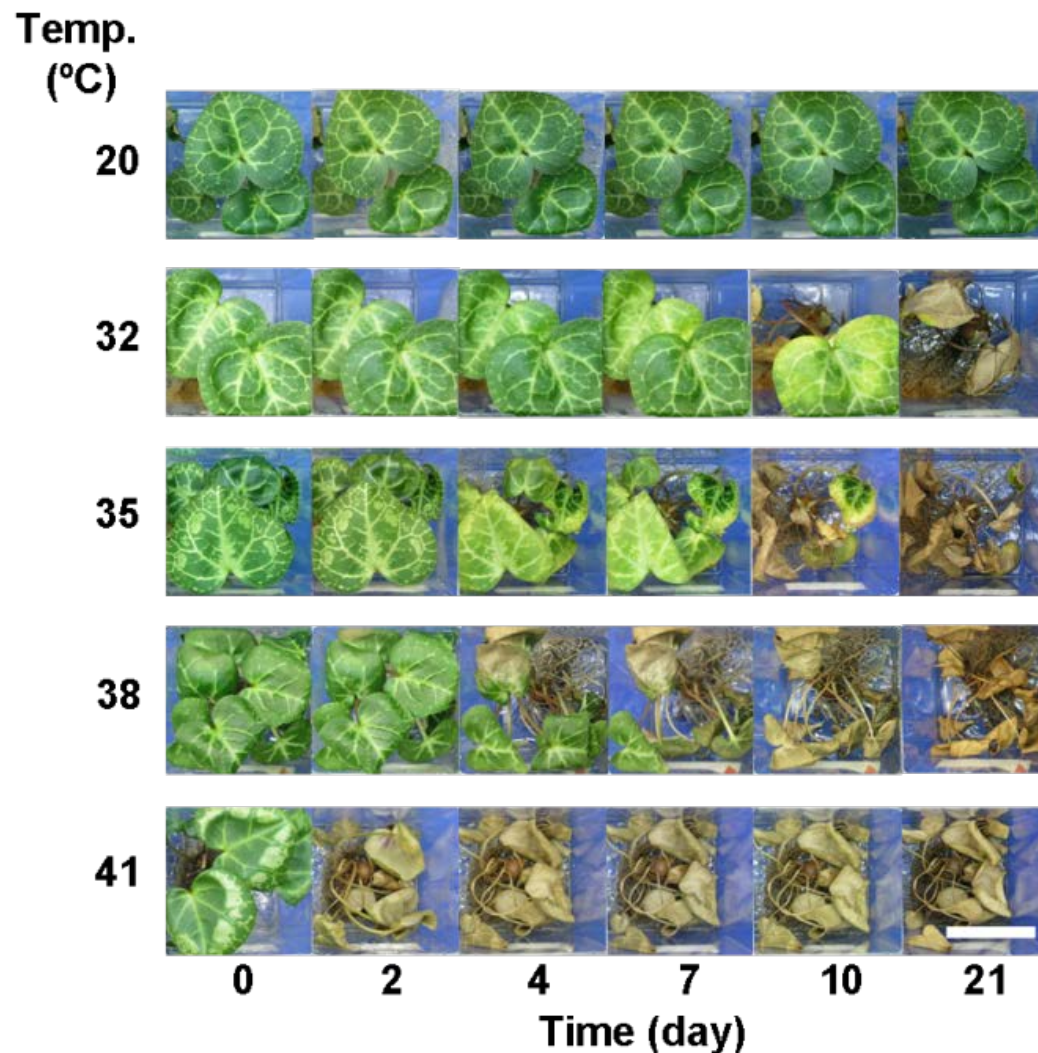

**Figure S1.** Establishment of suitable conditions for the evaluation of thermotolerance in cyclamen. WT plants were grown for 6 months (to the 4-5 leaf stage) on 1/2 MS medium at 20°C under 16 h light conditions ( $70 \mu\text{mol m}^{-2} \text{s}^{-1}$ ), then exposed to temperatures of 20, 32, 35, 38, or 41°C under constant light ( $70 \mu\text{mol m}^{-2} \text{s}^{-1}$ ). At temperatures of 35°C or less, the heat damage symptoms developed slowly and damaged areas were difficult to distinguish from undamaged areas. At 41°C, the leaf damage appeared too rapidly. Therefore, we selected 38°C as a moderate condition for evaluating heat damage in cyclamen seedlings grown on 1/2 MS medium. The bar indicates 5 cm.
